# Supplementary material for: Coupling Farmers' Quality of Life with Rural Revitalization Policy in the Guangdong–Hong Kong–Macao Greater Bay Area
Source: Research Square preprint supplement (doi:10.21203/rs.3.rs-6835481/v1), 2025-09-05
Supplement: Supplementary file 1 [file ed43a6a316d6462a740037e9.docx]

**Supplementary File 1:**

In the Q-sort of this study, the 22 participants classiﬁed into 3 types were calculated from 23 samples. And the 23 samples in the manuscript were screened from 34 samples. During face-to-face interviews over April to May 2023, a total number of 35 grain farmers, of which 34 valid (27 male (79%) and 7 female (21%)) were collected. Since the Q-methodology requires theoretical and dimensional sample structure rather than a large number of sample, the 61 samples were reﬁned based on the following 4 principles (which has been mentioned in the section 4.1 Results in the manuscript ):

1. Inclusion of representative feature samples;
2. Minimum of two samples per type;
3. Preference for samples with higher loading values when samples from the same county (district) belong to the same type;
4. Supplementation with unlabelled but significant cases, prioritizing female farmer respondents where feasible.

According to principle (1) to (4), 11 samples were screened from the 17 samples in the southern region of the city (Table S.1), 12 samples were screened from the 17 samples in the northern region of the city (Table S.3). 23 representative samples (Table S.5) are selected, the first and the second round type division calculation is carried out in the software P-Q-Method 2.35 (Table 3 in page 6 in the manuscript).

Of the 23 selected samples, 1 farmers were untypical of any of the Ⅰ / Ⅱ / Ⅲ factors, that the ﬁnal result is that the 22 participants being classiﬁed into 3 types.

Table S.1 17 sample load values in the southern region of the city for the first survey：

| NO. |  | 1 | 2 | 3 | 4 | 5 |
| --- | --- | --- | --- | --- | --- | --- |
| -1 | ZK1 | 0.3051 | 0.2756 | -0.428 | 0.5228 | 0.0825 |
| 2 | DYW2 | 0.1667 | 0.1543 | 0.0123 | 0.8191X | 0.2086 |
| -3 | DAW3 | 0.0245 | 0.4133 | -0.0626 | 0.3601 | 0.5852X |
| 4 | HY4 | 0.2365 | 0.162 | 0.1196 | 0.7200X | 0.2707 |
| 5 | HY5 | 0.0034 | 0.8600X | 0.2686 | 0.196 | -0.0539 |
| -6 | HY6 | 0.1677 | 0.8316X | -0.153 | 0.0531 | 0.3711 |
| 7 | HY7 | 0.6327X | 0.4421 | -0.2405 | 0.2884 | 0.0575 |
| 8 | HY8 | 0.3547 | 0.0438 | 0.0995 | 0.438 | 0.6803X |
| 9 | HD9(female) | 0.2202 | -0.0583 | -0.3882 | 0.3871 | 0.6769X |
| 10 | HD10(female) | 0.9337X | 0.0263 | -0.0121 | 0.2104 | 0.0919 |
| -11 | HD11 | 0.7811X | -0.0359 | -0.0092 | 0.1829 | 0.2547 |
| -12 | HD12 | 0.7429X | 0.2155 | -0.0135 | 0.3558 | 0.2847 |
| 13 | HD13 | 0.2788 | 0.3678 | -0.0708 | 0.5254 | 0.4472 |
| -14 | HC14(female) | 0.3174 | -0.204 | -0.1189 | 0.5893X | -0.1123 |
| 15 | HC15(female) | 0.2186 | 0.3248 | 0.2015 | 0.7651X | 0.1978 |
| 16 | HC16 | 0.1941 | 0.1572 | 0.3615 | -0.1307 | 0.7028X |
| 17 | HC17 | -0.0405 | 0.0757 | 0.8843X | 0.1392 | 0.0754 |
|  | % expl.Var. | 18 | 13 | 9 | 21 | 14 |

Note: The "-" before the serial number is the object to be removed after this round of operation. The specific screening principle can be found in the original paper, the same below.

Table S.2 Factor characteristic of southern region：

| Type | 1 | 2 | 3 | 4 | 5 |
| --- | --- | --- | --- | --- | --- |
| Number of labeled samples | 4 | 2 | 1 | 4 | 4 |
| Composite reliability | 0.941 | 0.889 | 0.800 | 0.941 | 0.941 |
| S.E. of factor Z-scores | 0.243 | 0.333 | 0.447 | 0.243 | 0.243 |

Table S.3 17 sample load values in the northern region of the city for the second survey：

| NO. |  | 1 | 2 | 3 | 4 | 5 |
| --- | --- | --- | --- | --- | --- | --- |
| 1 | BL1 | 0.1221 | 0.1631 | 0.9058X | 0.0746 | 0.0736 |
| 2 | BL2 | 0.3887 | -0.0289 | 0.1201 | 0.8258X | 0.1845 |
| -3 | BL3 | 0.5923X | 0.45 | -0.0441 | 0.2107 | 0.2196 |
| 4 | BL4(female) | 0.2312 | 0.5495 | -0.0922 | -0.0688 | 0.6697X |
| 5 | BL5 | 0.3811 | -0.0785 | 0.1693 | 0.7964X | 0.075 |
| 6 | BL6(female) | 0.0037 | 0.8198X | 0.1146 | 0.2455 | 0.1759 |
| -7 | BL7 | 0.0761 | 0.8988X | -0.027 | -0.1326 | 0.1511 |
| 8 | BL8 | 0.7628X | 0.195 | 0.1466 | 0.2657 | 0.1324 |
| 9 | BL9 | 0.3491 | 0.2985 | 0.6690X | 0.3559 | 0.1773 |
| 10 | BL10 | 0.4366 | 0.1465 | 0.5126 | 0.1915 | 0.4978 |
| 11 | BL11 | 0.2107 | -0.0009 | 0.39 | 0.3502 | 0.6687X |
| -12 | LM12 | 0.6736X | 0.1726 | 0.4733 | 0.2452 | -0.017 |
| 13 | LM13 | 0.0881 | 0.6216 | 0.3194 | 0.5436 | -0.0241 |
| 14 | LM14 | 0.2091 | 0.8167X | 0.3183 | -0.2725 | -0.096 |
| -15 | LM15(female) | 0.4307 | 0.7180X | 0.3131 | 0.0304 | 0.0278 |
| 16 | LM16 | 0.7074X | -0.1255 | 0.3633 | 0.238 | 0.2632 |
| -17 | LM17 | 0.6228X | 0.4422 | 0.0723 | 0.3061 | 0.2115 |
|  |  | 19 | 23 | 14 | 14 | 9 |

Table S.4Factor characteristic of norther region：

| Type | 1 | 2 | 3 | 4 | 5 |
| --- | --- | --- | --- | --- | --- |
| Number of labeled samples） | 5 | 4 | 2 | 2 | 2 |
| Composite reliability | 0.952 | 0.941 | 0.889 | 0.889 | 0.889 |
| S.E. of factor Z-scores | 0.218 | 0.243 | 0.333 | 0.333 | 0.333 |

Table S.5 23 Selected sample load values：

|  |  | 1 | 2 | 3 |
| --- | --- | --- | --- | --- |
| 1 | DYW2 | -0.0213 | 0.8028X | 0.1088 |
| 2 | HY4 | 0.1717 | 0.7699X | 0.2226 |
| 3 | HY5 | 0.1801 | 0.334 | -0.0177 |
| 4 | HY7 | -0.0405 | 0.6784X | 0.1768 |
| 5 | HY8 | 0.3581 | 0.7682X | -0.0927 |
| 6 | HD9 | -0.0143 | 0.6849X | 0.1219 |
| 7 | HD10 | 0.0339 | 0.6410X | 0.0232 |
| 8 | HD13 | 0.1234 | 0.7887X | 0.0097 |
| 9 | HC15 | 0.1692 | 0.7744X | 0.0734 |
| 10 | HC16 | 0.7701X | 0.2585 | -0.0592 |
| 11 | HC17 | 0.6086X | -0.0222 | 0.1555 |
| 12 | BL1 | 0.5487X | -0.1365 | 0.4291 |
| 13 | BL2 | 0.8027X | 0.3216 | -0.0929 |
| 14 | BL4 | 0.1806 | 0.1874 | 0.5936X |
| 15 | BL5 | 0.8127X | 0.2323 | -0.127 |
| 16 | BL6 | 0.1217 | 0.1767 | 0.8010X |
| 17 | BL8 | 0.6647X | -0.0644 | 0.3077 |
| 18 | BL9 | 0.7182X | 0.1808 | 0.4391 |
| 19 | BL10 | 0.7165X | -0.0463 | 0.3842 |
| 20 | BL11 | 0.6625X | 0.2668 | 0.1542 |
| 21 | LM13 | 0.4368 | 0.1408 | 0.6002X |
| 22 | LM14 | -0.0506 | 0.0337 | 0.8910X |
| 23 | LM16 | 0.7632X | 0.0782 | 0.0628 |
| % | expl.Var. | 25 | 20 | 18 |

Table S.6 Factor characteristic：：

| Type | Ⅰ | Ⅱ | Ⅲ |
| --- | --- | --- | --- |
| Number of labeled samples | 10 | 8 | 4 |
| Composite reliability | 0.976 | 0.970 | 0.941 |
| S.E. of factor Z-scores | 0.156 | 0.174 | 0.243 |
